# Supplementary material
Source: publisher figshare collection journal article supplement (https://acs.figshare.com/ndownloader/files/4975749)
Supplement: Supplementary file 1 [file 4975749]

## Supporting Information

### **FeB<sub>6</sub> Monolayers: The Graphene-like Material with Hypercoordinate Transition Metal**

Haijun Zhang,<sup>†</sup> Yafei Li,<sup>‡</sup> Jianhua Hou,<sup>†</sup> Kaixiong Tu,<sup>†</sup> Zhongfang Chen<sup>†,\*</sup>

Department of Chemistry, Institute for Functional Nanomaterials, University of Puerto Rico, Rio Piedras Campus, San Juan, PR 00931, USA, College of Chemistry and Materials Science, Jiangsu Key Laboratory of Biofunctional Materials, Nanjing Normal University, Nanjing, Jingsu, 210046, China

<sup>†</sup> University of Puerto Rico

<sup>‡</sup> Nanjing Normal University

To whom correspondence should be addressed. Email: [zhongfangchen@gmail.com](mailto:zhongfangchen@gmail.com) (ZC)

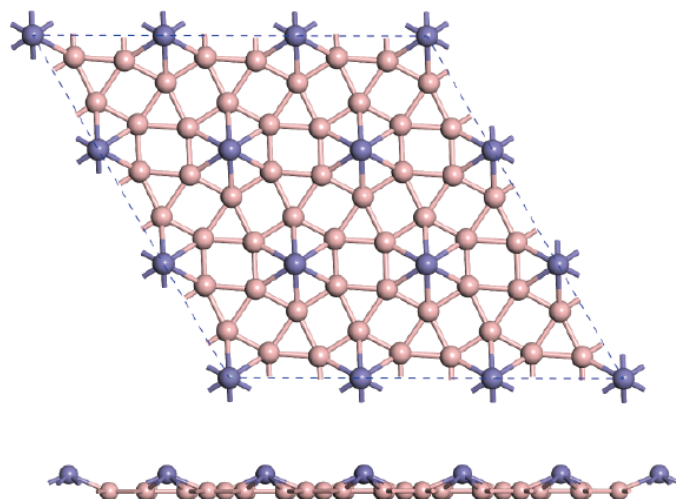

**Fig. S1** Snapshot of final  $\beta$ -FeB<sub>6</sub> sheet at 3000 K after 10 *ps* AIMD simulations.

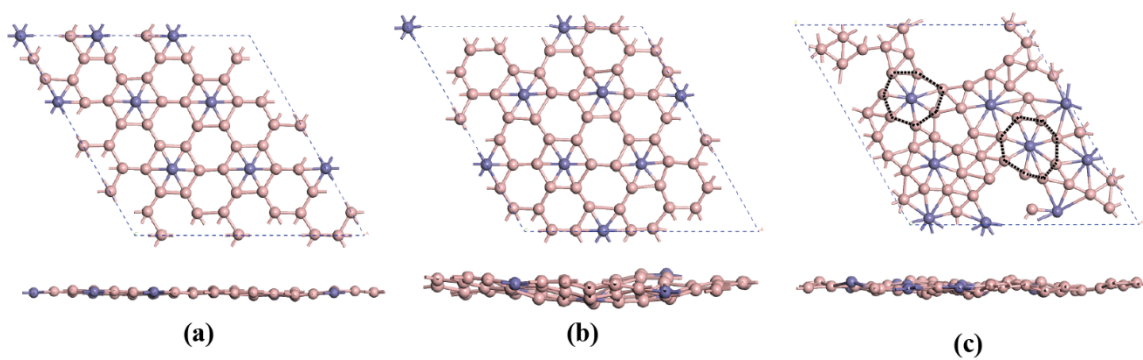

**Fig. S2** Snapshot of final  $\gamma$ -FeB<sub>6</sub> monolayers at (a) 300 K, (b) 500 K and (c) 1000 K, at the end of 10 *ps* AIMD simulations. Black dashed lines are guide lines for emphasizing the Fe@B<sub>7</sub> and Fe@B<sub>8</sub> units.

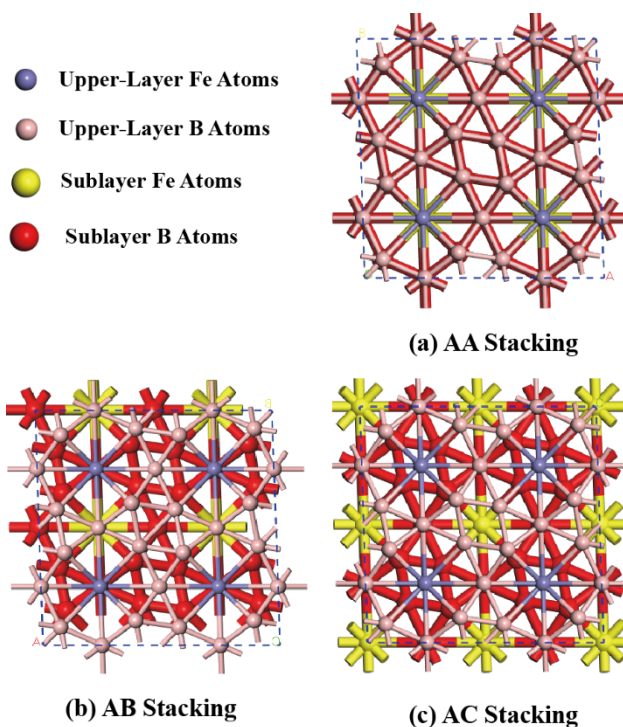

**Fig. S3** The optimized structures of the  $\alpha$ -FeB<sub>6</sub> bilayer systems with different stacking patterns. In AA (a) and AB (b) stacking bilayers, the Fe atoms in the upper layers are directly located above the Fe (AA stacking) and B (AB stacking) atoms in the sublayers, respectively. In AC (c) stacking pattern, the Fe atoms in the upper layer are above the center of B<sub>4</sub> rings in the lower layer.

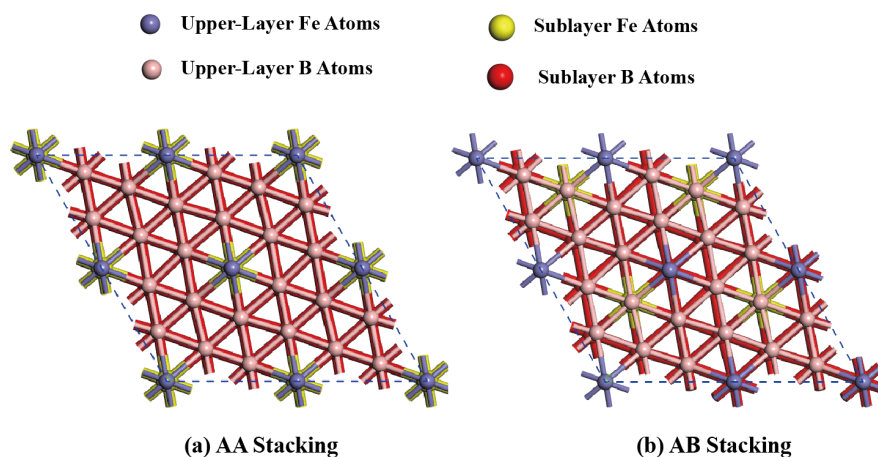

**Fig. S4** The optimized structures of the  $\beta$ -FeB<sub>6</sub> bilayer systems with different stacking patterns. In AA (a) and AB (b) stacking bilayers, the Fe atoms in the upper layer directly locate above the Fe (AA stacking) and B (AB stacking) atoms in the sublayers, respectively. Because of the high density of boron atoms, there are only B<sub>3</sub> rings in the  $\beta$ -FeB<sub>6</sub> sheet, and it's impossible to establish a geometry with the upper-layer Fe atoms locating above the center of B<sub>3</sub> rings in the sublayer. Accordingly, the AC stacking is not available in the  $\beta$ -FeB<sub>6</sub> bilayer system.

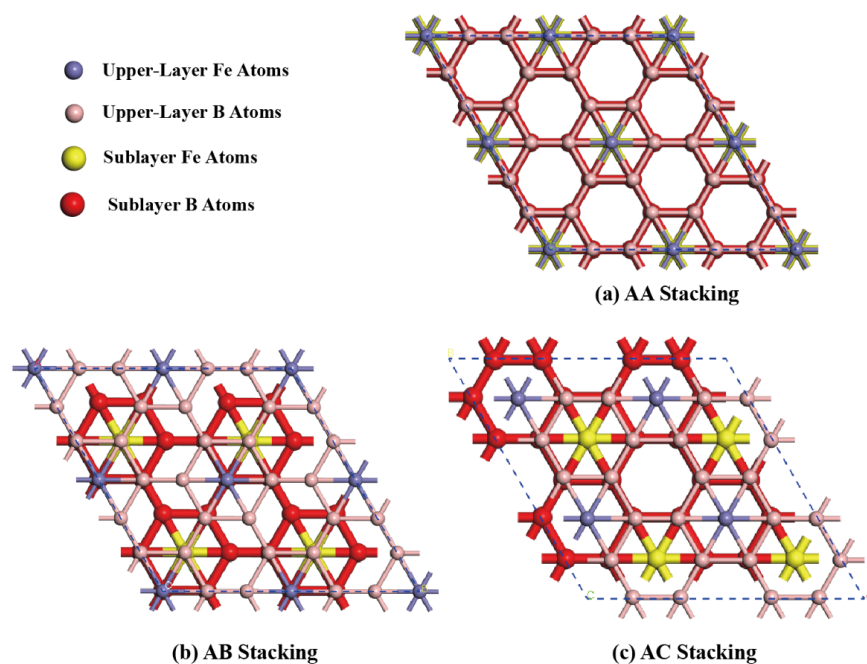

**Fig. S5** The optimized structures of the  $\gamma$ -FeB<sub>6</sub> bilayer systems with different stacking patterns. In AA (a) and AB (b) stacking bilayers, the Fe atoms in the upper layer directly locate above the Fe (AA stacking) and B (AB stacking) atoms in the sublayers, respectively. In AC (c) stacking pattern, the Fe atoms in the upper layer are above the center of B<sub>6</sub> rings in the lower layer

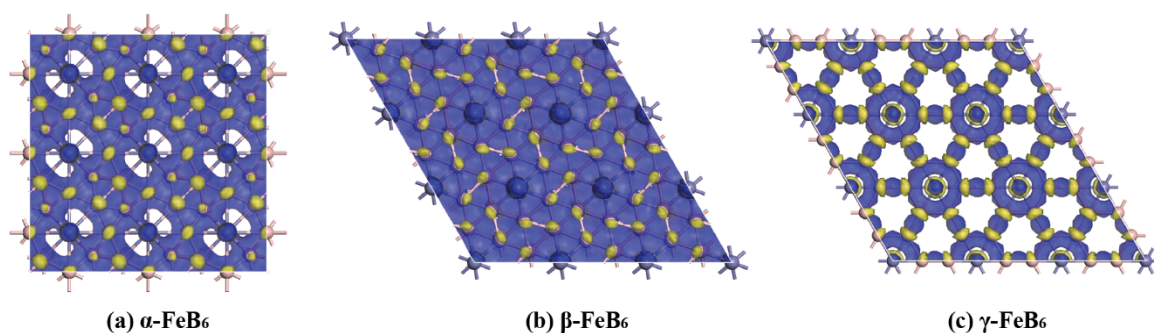

**Fig. S6** Deformation electronic density plotted with iso-surface value of 0.05 e/au, for the (a)  $\alpha$ -FeB<sub>6</sub>, (b)  $\beta$ -FeB<sub>6</sub> and (c)  $\gamma$ -FeB<sub>6</sub> monolayers. Blue and yellow refer to the accumulation and depletion of electrons, respectively.

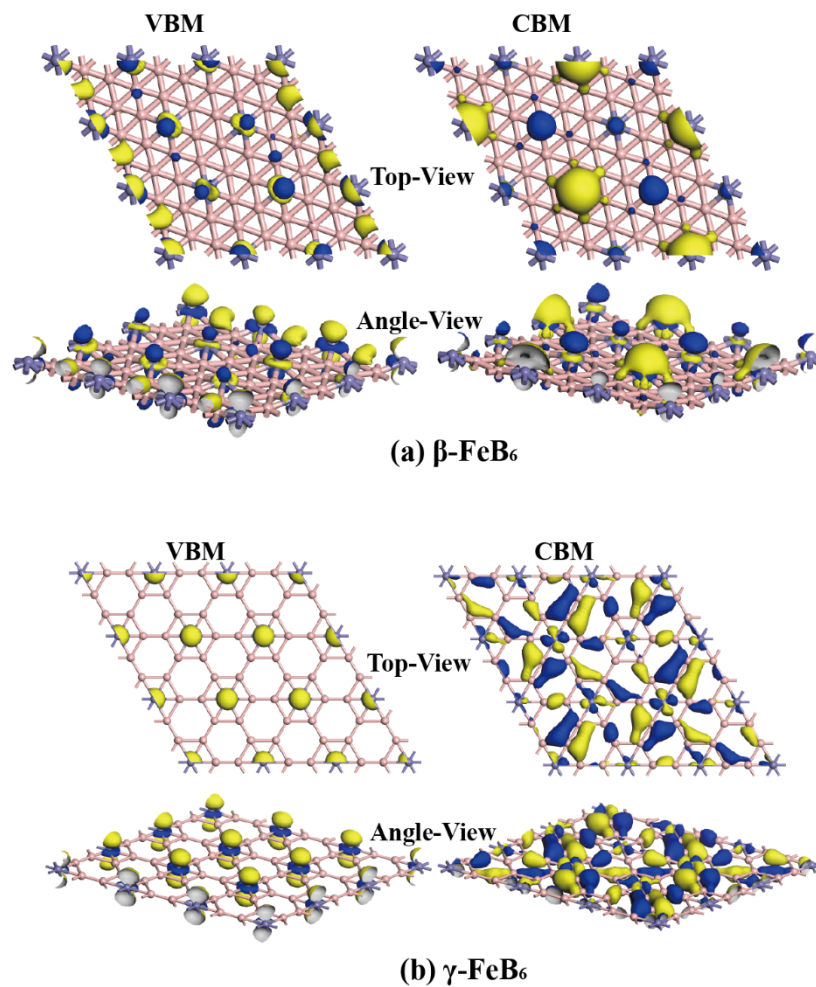

**Fig. S7** Charge distributions of valence band maximum (VBM) and conduction band minimum (CBM) at  $\Gamma$  point for the semiconducting (a)  $\beta$ -FeB<sub>6</sub> and (b)  $\gamma$ -FeB<sub>6</sub> monolayers. The iso-value is 0.02 e·Å<sup>-3</sup>

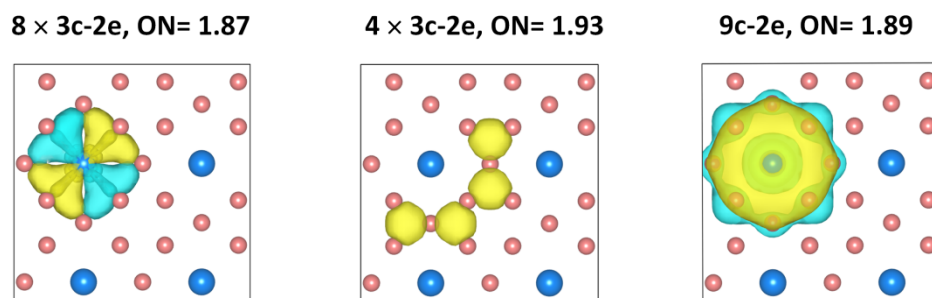

**Figure S8.** Schematic of SSAdNDP chemical bonding pattern for  $\alpha$ -FeB<sub>6</sub> monolayer.

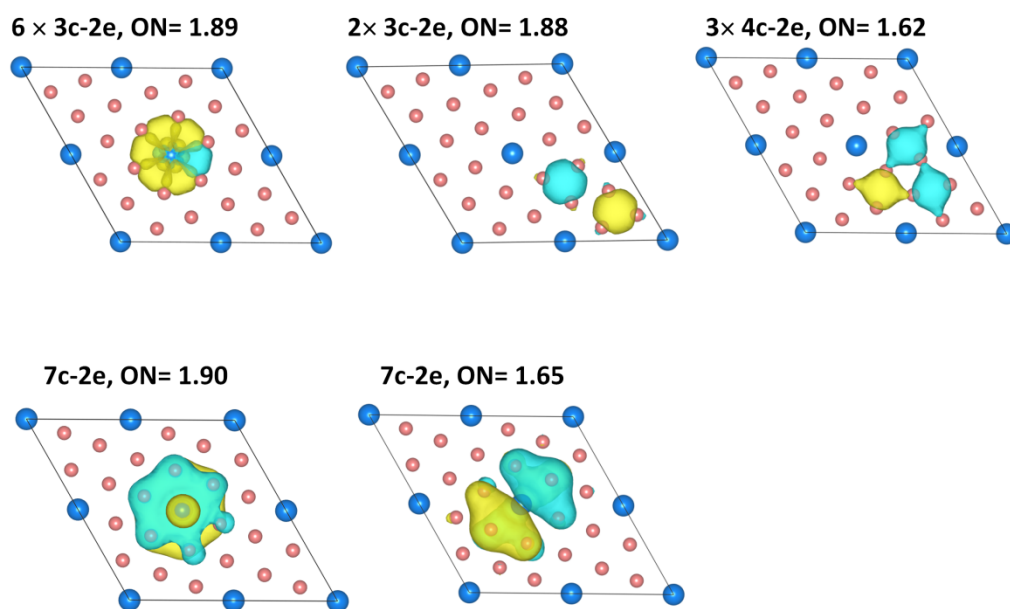

**Figure S9.** Schematic of SSAdNDP chemical bonding pattern for  $\beta$ -FeB<sub>6</sub> monolayer.

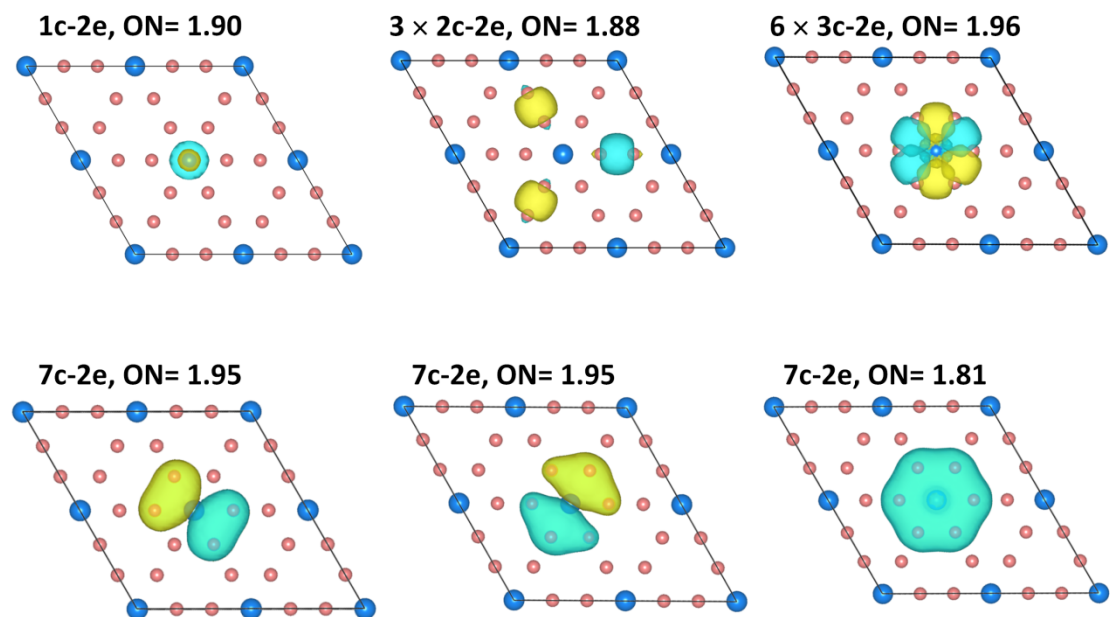

**Figure S10.** Schematic of SSAdNDP chemical bonding pattern for  $\gamma$ -FeB<sub>6</sub> monolayer.

**Table S1** The interlayer distances ( $d$  in Å) and binding energies ( $E_B$  in meV/atom) of the  $\alpha$ -FeB<sub>6</sub>,  $\beta$ -FeB<sub>6</sub> and  $\gamma$ -FeB<sub>6</sub> bilayer systems with different stacking patterns computed at the PBE+D2 level of theory. The  $E_B$  is defined as the total energies of the two corresponding constituent FeB<sub>6</sub> monolayers minus the total energy of the fully relaxed FeB<sub>6</sub> bilayer systems.

|                            | AA Stacking |       | AB Stacking |       | AC Stacking |       |
|----------------------------|-------------|-------|-------------|-------|-------------|-------|
|                            | $d$         | $E_B$ | $d$         | $E_B$ | $d$         | $E_B$ |
| $\alpha$ -FeB <sub>6</sub> | 3.00        | 32    | 2.81        | 68    | 2.69        | 88    |
| $\beta$ -FeB <sub>6</sub>  | 3.01        | 36    | 2.95        | 58    | none        | none  |
| $\gamma$ -FeB <sub>6</sub> | 2.89        | 14    | 2.49        | 102   | 3.55        | 0     |
